# Supplementary material for: Unveiling the Ecological Niche: Long-Term Dynamics of Abandoned vs. Forested Landscapes and the Path to Species-Specific Forest Restoration
Source: Research Square preprint supplement (doi:10.21203/rs.3.rs-7216029/v1), 2025-10-07
Supplement: Supplementary file 1 [file 1109575ffaf3293a2ef52492.docx]

| **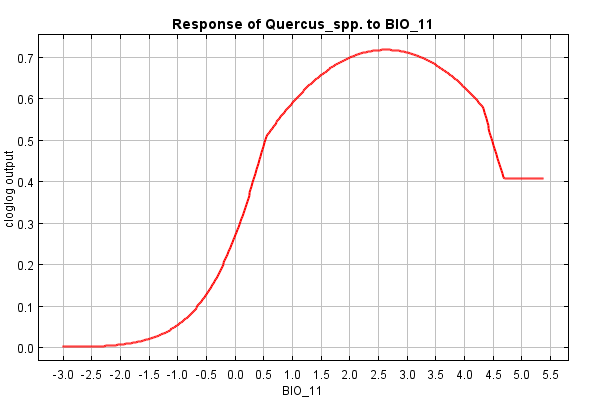** | **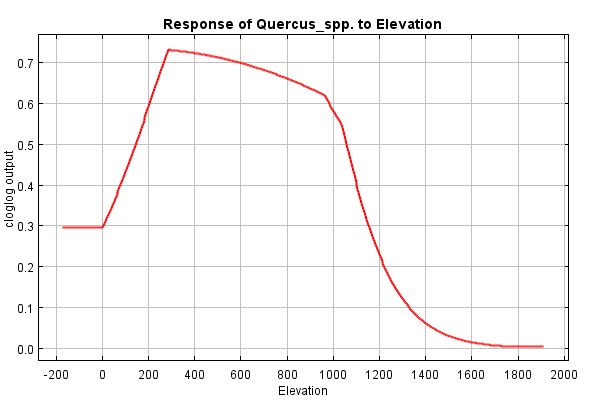** | |
| --- | --- | --- |
| ***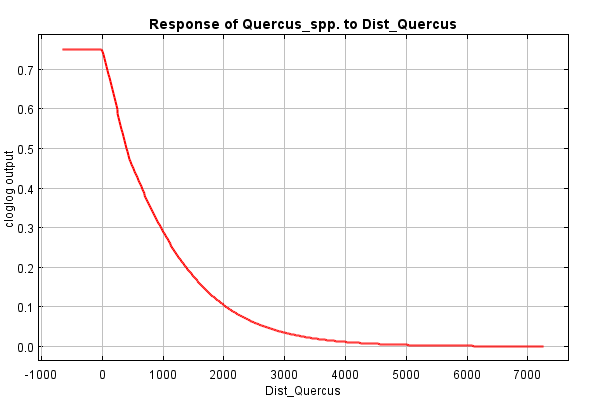*** | |

*Fig. S1. Response curves of major bioclimatic and environmental variables as derived by MaxEnt modelling, indicating FT1 probability (cloglog) of occurrence in RMNP, created using only each of the corresponding variable (distance values in m. and BIO11 values in oC)*

| ***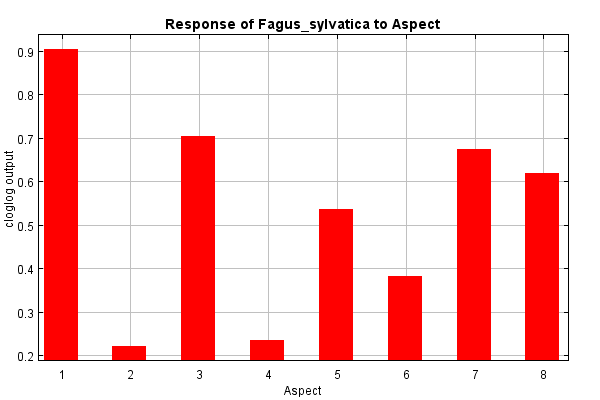*** | ***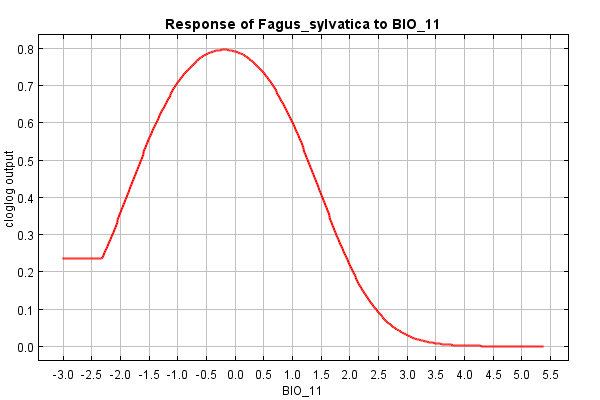*** |
| --- | --- |

*Fig. S2. Response curves of major bioclimatic and environmental variables as derived by MaxEnt modelling, indicating FT2 probability (cloglog) of occurrence in RMNP, created using only each of the corresponding variable (distance values in m., BIO11 values in oC and Aspect categories as described in 2.3-Data processing and analysis)*

| ***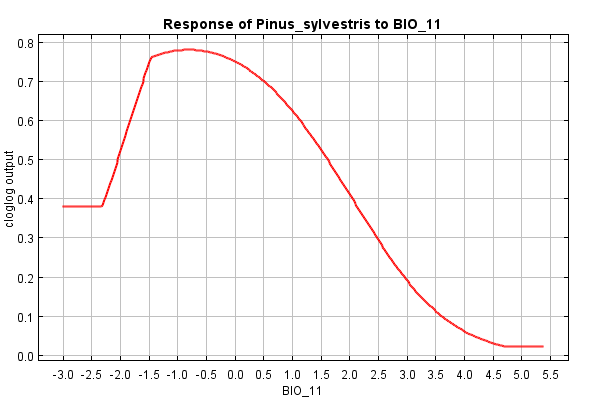*** | ***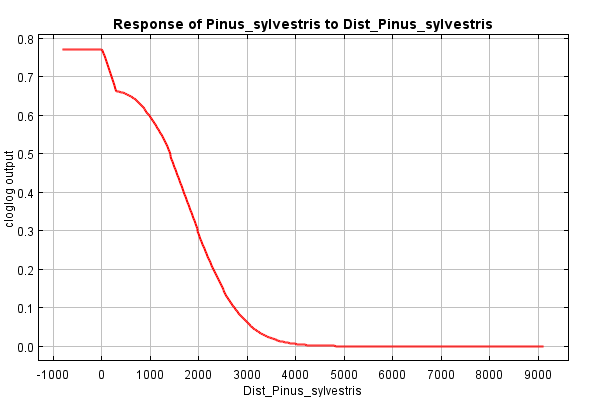*** |
| --- | --- |

Fig. S3. Response curves of major bioclimatic and environmental variables as derived by MaxEnt modelling, indicating FT3 probability (cloglog) of occurrence in RMNP, created using only each of the corresponding variable (distance values in m., BIO11 values in oC)

| ***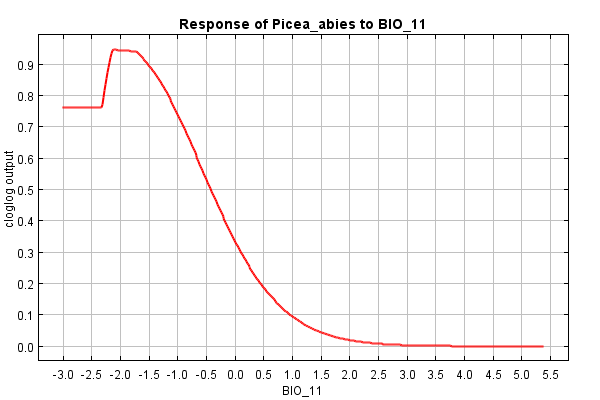*** | ***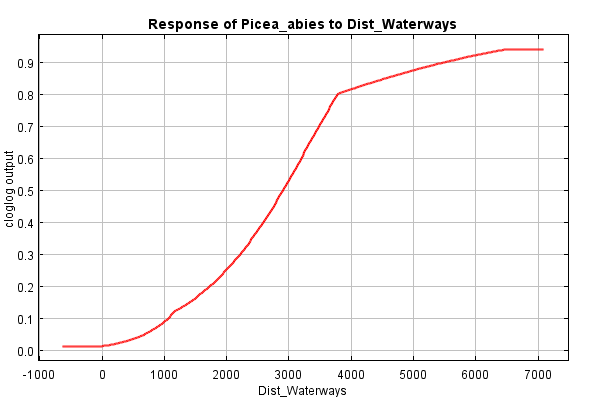*** |
| --- | --- |

Fig. S4. Response curves of major bioclimatic and environmental variables as derived by MaxEnt modelling, indicating FT4 probability (cloglog) of occurrence in RMNP, created using only each of the corresponding variables (BIO11 values in oC, distance values in m.)

| ***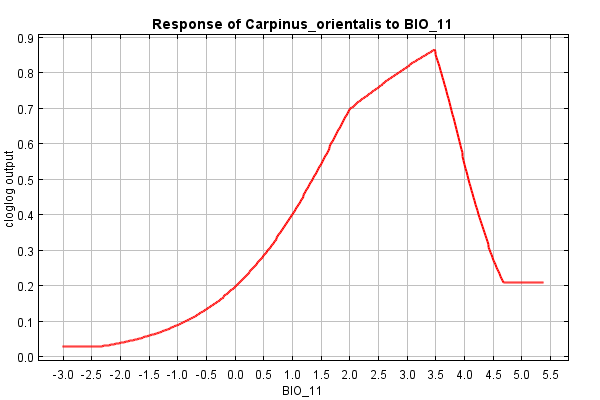*** | ***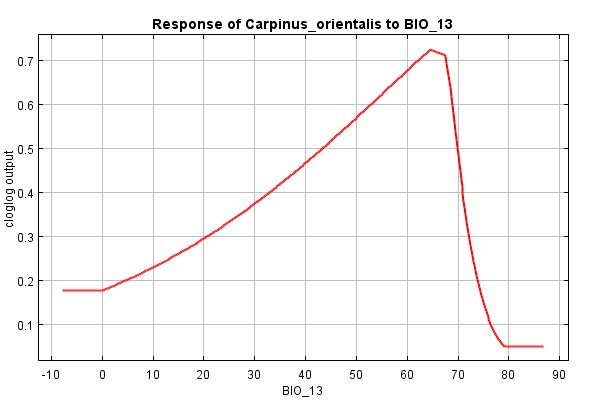*** |
| --- | --- |
| ***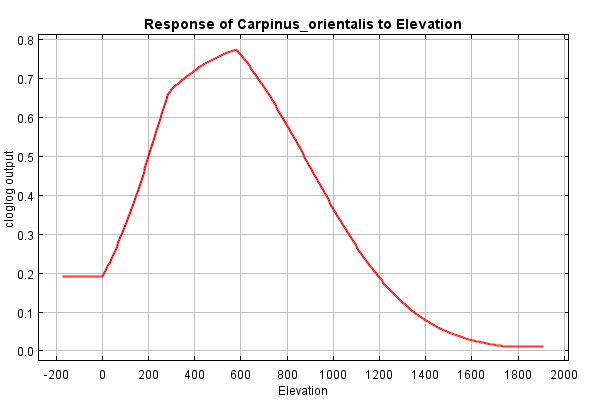*** | |

Fig. S5. Response curves of major bioclimatic and environmental variables as derived by MaxEnt modelling, indicating FT5 probability (cloglog) of occurrence in RMNP, created using only each of the corresponding variables (elevation values in m., BIO11 values in oC, BIO13 values in mm/month)

| ***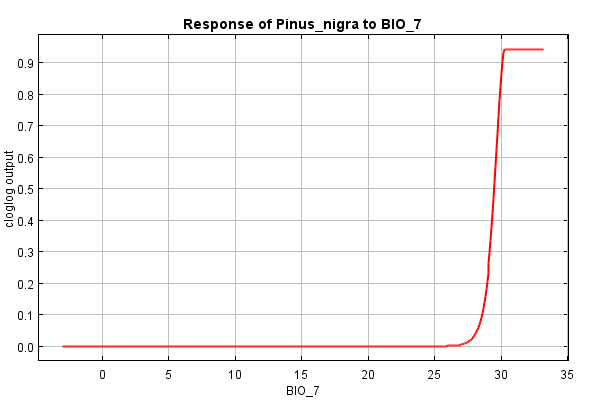*** | ***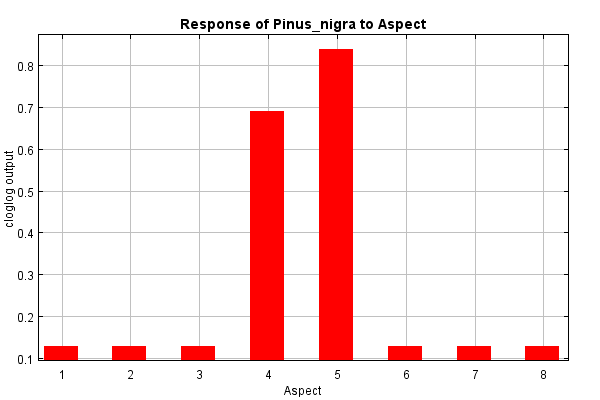*** |
| --- | --- |

Fig. S6. Response curves of major bioclimatic and environmental variables as derived by MaxEnt modelling, indicating FT6 probability (cloglog) of occurrence in RMNP, created using only each of the corresponding variables (BIO7 values in oC and Aspect categories as described in 2.3-Data processing and analysis).

| ***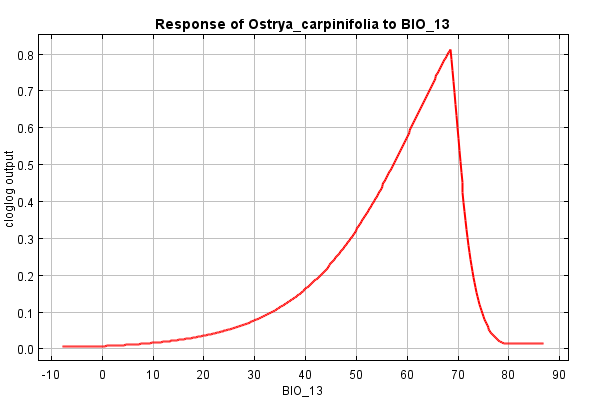*** | ***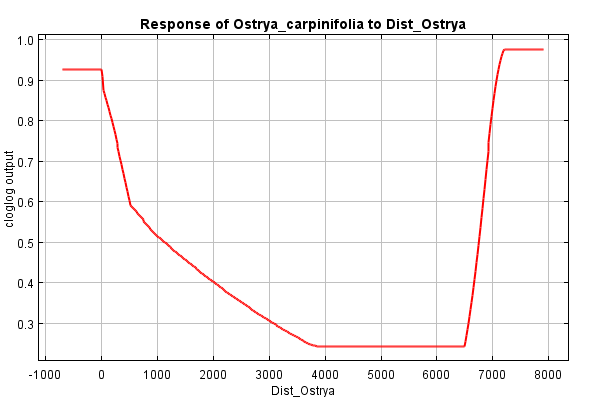*** |
| --- | --- |

Fig. S7. Response curves of major bioclimatic and environmental variables as derived by MaxEnt modelling, indicating FT7 probability (cloglog) of occurrence in RMNP, created using only each of the corresponding variables (BIO13 values in mm/month and distance in meters).

| ***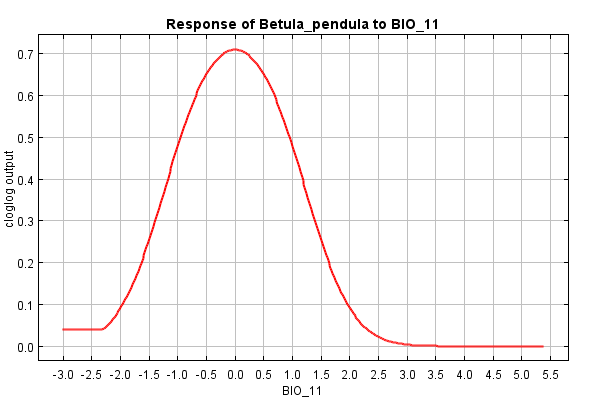*** | ***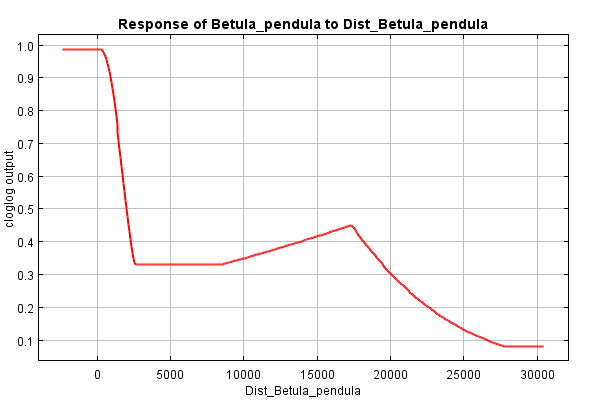*** |
| --- | --- |
| ***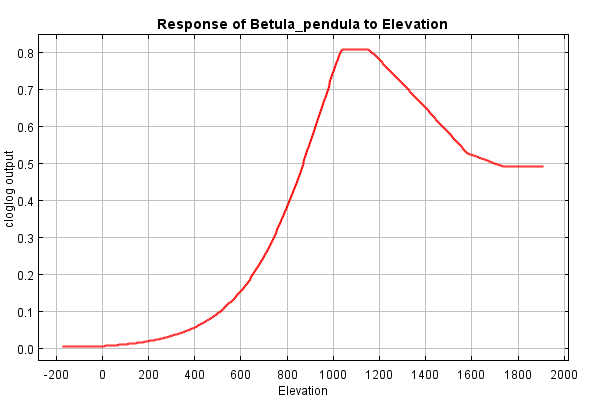*** | |

Fig. S8. Response curves of major bioclimatic and environmental variables as derived by MaxEnt modelling, indicating FT8 probability (cloglog) of occurrence in RMNP, created using only each of the corresponding variables (BIO11 values in oC, distance and elevation in meters).
